# Supplementary material for: Optic Nerve Sheath Fenestration for Progressive Visual Loss in Cerebral Venous Sinus Thrombosis: A Long-Term Retrospective Observational Study
Source: PubMed Central journal article supplement — Neurol Ther. 2023 Jan 7;12(2):441–57. doi: 10.1007/s40120-022-00434-9 (PMC10043064; doi:10.1007/s40120-022-00434-9), 2023-01-07
Supplement: 40120_2022_434_MOESM1_ESM.pdf [file 40120_2022_434_MOESM1_ESM.pdf]

# Optic nerve sheath fenestration for progressive visual loss in cerebral venous sinus thrombosis: A long-term observational study

Zongshan Li,<sup>1,2\*</sup> Lu Cheng,<sup>1,3,4\*</sup> Yang Xu,<sup>5\*</sup> Qiao Sun,<sup>6\*</sup> Jian Zhang,<sup>1,3,4</sup> Lin Bai,<sup>1,3,4</sup> Ting Feng,<sup>7</sup> Song Tan,<sup>8</sup> Huan Wang,<sup>9</sup> Bolin Deng,<sup>10</sup> Qiang Li,<sup>11</sup> Yaxing Gui,<sup>2#</sup> Hui Chen,<sup>1,4,5,12,13,14#</sup>

## Author Affiliations:

<sup>1</sup> Department of Ophthalmology, Shanghai General Hospital, Shanghai Jiao Tong University School of Medicine, Shanghai, China.

<sup>2</sup> Department of Neurology, Shanghai General Hospital, Shanghai Jiao Tong University School of Medicine, Shanghai, China.

<sup>3</sup> Shanghai Key Laboratory of Ocular Fundus Diseases, Shanghai, China.

<sup>4</sup> National Clinical Research Center for Eye Diseases, Shanghai, China.

<sup>5</sup> Eye School of Chengdu University of Traditional Chinese Medicine, Chengdu, Sichuan Province, China.

<sup>6</sup> Department of Ophthalmology, Shanghai Aier Eye Hospital, Shanghai, China.

<sup>7</sup> Department of Ophthalmology, Puren Hospital Affiliated to Wuhan University of Science and Technology, Wuhan, Hubei Province, China.

<sup>8</sup> Department of Neurology, Sichuan Provincial People's Hospital, University of Electronic Science and Technology of China, Chengdu, Sichuan Province, China.

<sup>9</sup> Eastern Hospital, Sichuan Academy of Medical Sciences & Sichuan Provincial People's Hospital, Chengdu, Sichuan Province, China.

<sup>10</sup> Department of Ophthalmology, Sichuan Academy of Medical Sciences & Sichuan Provincial People's Hospital, University of Electronic Science and Technology of China, Chengdu, Sichuan Province, China.

<sup>11</sup> Neurovascular Center, Changhai Hospital, Naval medical university, Shanghai, China.

<sup>12</sup> School of Medicine, University of Electronic Science and Technology of China, Chengdu, Sichuan Province, China.

<sup>13</sup> Chengdu Medical College, Chengdu, Sichuan Province, China.

<sup>14</sup> University of Shanghai for Science and Technology, Shanghai, China.

\*Z.L., L.C., Y.X. and Q.S. are co-first authors of this manuscript.

#Y.G. and H.C. are co-corresponding authors of this manuscript.

**Correspondence to:**

Hui Chen, MD, Department of Ophthalmology, Shanghai General Hospital, Shanghai Jiao Tong University School of Medicine, No.100 Haining Road, Shanghai 200080, China

e-mail: 352477354@qq.com

Yaxing Gui, PhD, Department of Neurology, Shanghai General Hospital, Shanghai Jiao Tong University School of Medicine, No.100 Haining Road, Shanghai 200080, China

e-mail: YaxingGui@shsmu.edu.cn

**Table S1.** ADL scores and NEI VFQ-25 overall/subscale scores at the last follow-up

|                          | 1   | 2   | 3    | 4    | 5    | 6    | 7    | 8    | 9    | 10   | 11  | 12   | 13   | 14   | 15   | 16   | 17   | 18   | Mean (SD)   |
|--------------------------|-----|-----|------|------|------|------|------|------|------|------|-----|------|------|------|------|------|------|------|-------------|
| <b>ADL scores</b>        | N/A | N/A | 100  | 100  | 100  | 95   | 25   | 80   | 85   | 100  | N/A | 100  | 100  | 95   | 95   | 100  | 100  | 90   | 91 (18.6)   |
| <b>NEI VFQ-25</b>        |     |     |      |      |      |      |      |      |      |      |     |      |      |      |      |      |      |      |             |
| <b>Overall score</b>     | N/A | N/A | 18.9 | 9.5  | 87.3 | 14   | 10.2 | 10.2 | 13.4 | 70.8 | N/A | 65.5 | 35.6 | 30.7 | 40.7 | 50.8 | 86.7 | 64.4 | 40.6 (27.5) |
| <b>General health</b>    | N/A | N/A | 50   | 25   | 50   | 50   | 0    | 50   | 25   | 50   | N/A | 75   | 50   | 50   | 50   | 25   | 75   | 25   | 43.3 (19.3) |
| <b>General vision</b>    | N/A | N/A | 25   | 0    | 50   | 0    | 0    | 0    | 0    | 50   | N/A | 50   | 25   | 25   | 50   | 25   | 75   | 50   | 28.3 (23.9) |
| <b>Ocular pain</b>       | N/A | N/A | 100  | 37.5 | 100  | 100  | 100  | 100  | 100  | 100  | N/A | 100  | 100  | 87.5 | 75   | 100  | 75   | 75   | 90 (17.2)   |
| <b>Near activity</b>     | N/A | N/A | 16.7 | 8.3  | 100  | 0    | 0    | 0    | 0    | 83.3 | N/A | 75   | 25   | 16.7 | 33.3 | 50   | 100  | 66.7 | 38.3 (36.4) |
| <b>Distance activity</b> | N/A | N/A | 8.3  | 8.3  | 100  | 0    | 0    | 0    | 8.3  | 75   | N/A | 58.3 | 16.7 | 25   | 25   | 33.3 | 91.7 | 66.7 | 34.4 (33.6) |
| <b>Social function</b>   | N/A | N/A | 0    | 12.5 | 100  | 0    | 0    | 0    | 0    | 87.5 | N/A | 75   | 25   | 25   | 62.5 | 87.5 | 100  | 87.5 | 44.2 (40.5) |
| <b>Mental health</b>     | N/A | N/A | 12.5 | 12.5 | 56.3 | 25   | 12.5 | 12.5 | 31.3 | 50   | N/A | 50   | 37.5 | 50   | 31.3 | 25   | 62.5 | 50   | 34.6 (17.1) |
| <b>Role difficulties</b> | N/A | N/A | 37.5 | 0    | 87.5 | 12.5 | 0    | 0    | 0    | 75   | N/A | 87.5 | 62.5 | 25   | 12.5 | 62.5 | 75   | 37.5 | 38.3 (32.7) |
| <b>Dependency</b>        | N/A | N/A | 8.3  | 0    | 66.7 | 16.7 | 0    | 0    | 8.3  | 33.3 | N/A | 50   | 25   | 8.3  | 8.3  | 0    | 75   | 25   | 21.7 (23.7) |
| <b>Driving</b>           | N/A | N/A | 0    | 0    | 100  | 0    | 0    | 0    | 0    | 50   | N/A | 0    | 0    | 25   | 25   | 0    | 100  | 75   | 25 (36.5)   |
| <b>Color vision</b>      | N/A | N/A | 0    | 0    | 100  | 0    | 0    | 0    | 0    | 100  | N/A | 100  | 50   | 25   | 50   | 100  | 100  | 100  | 48.3 (45.2) |
| <b>Peripheral vision</b> | N/A | N/A | 0    | 25   | 100  | 0    | 0    | 0    | 0    | 75   | N/A | 75   | 25   | 25   | 75   | 75   | 100  | 75   | 43.3 (38.2) |

ADL, Activity of Daily Living; N/A, not available; NEI VFQ-25, National Eye Institute Visual Function Questionnaire 25; SD, Standard deviation.
